# Supplementary material for: The Yeast GSK-3 Homologue Mck1 Is a Key Controller of Quiescence Entry and Chronological Lifespan
Source: PubMed Central journal article supplement (PMC4477894; doi:10.1371/journal.pgen.1005282), 2015-06-23

### Supplementary Figure 4

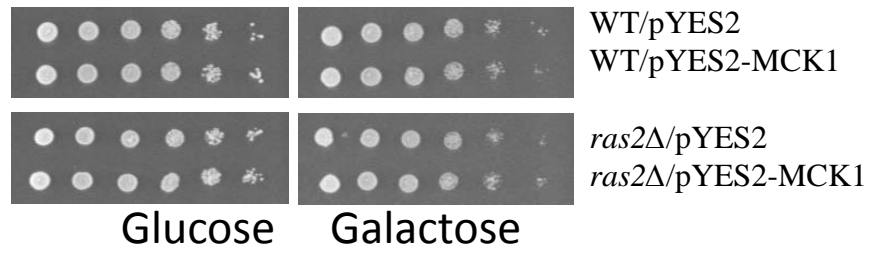

Supplement: pgen.1005282.s004.pdf [file pgen.1005282.s004.pdf]
